# Supplementary material for: Reinforcement of Refined and Semi-Refined Carrageenan Film with Nanocellulose
Source: PubMed Central journal article supplement (PMC7285119; doi:10.3390/polym12051145), 2020-05-17

# Reinforcement of Refined and Semi-Refined Carrageenan Film with Nanocellulose

Bakti B. Sedayu, Marlene J. Cran, Stephen W. Bigger

## Supplementary Material

**Figure S1.** Complete set of TG (upper) and dTG (lower) thermographs of SRC/NCF (left) and RC/NCF (right) films

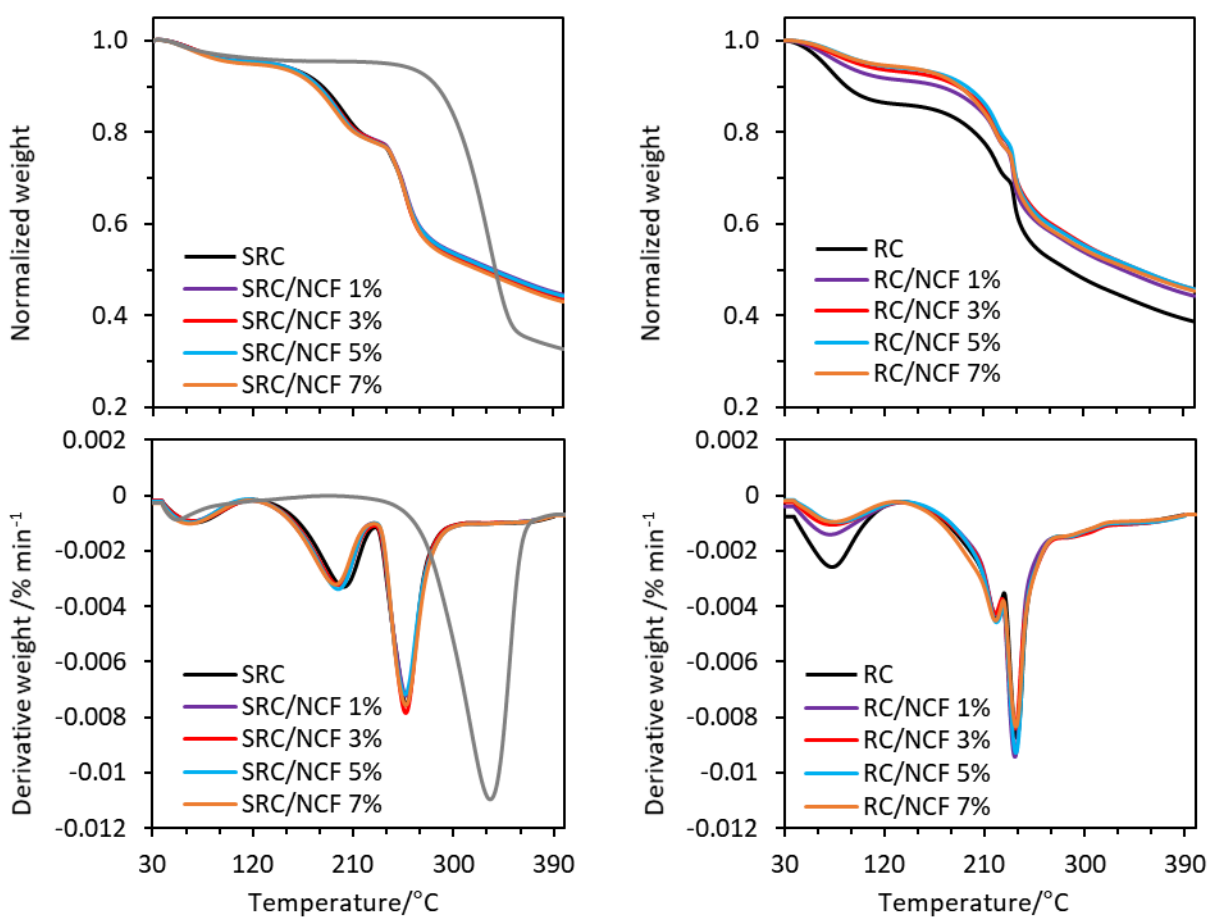

**Table S1.** Data obtained from the TG decomposition profiles of the SRC and RC films

| <b>Film samples</b> | <b>2<sup>nd</sup> decomposition peak/°C</b> | <b>Onset temp./°C</b> | <b>Endset temp./°C</b> | <b>Residue at 225°C/%</b> | <b>Max. decomposition peak/°C</b> | <b>Onset temp./°C</b> | <b>Endset temp./°C</b> | <b>Residue at 400°C/%</b> |
|---------------------|---------------------------------------------|-----------------------|------------------------|---------------------------|-----------------------------------|-----------------------|------------------------|---------------------------|
| SRC                 | 200.11                                      | 170.77                | 214.21                 | 78.73                     | 257.87                            | 245.6                 | 268.99                 | 44.11                     |
| SRC/NCF1%           | 193.5                                       | 164.46                | 208.51                 | 78.8                      | 257.61                            | 245.16                | 269.71                 | 44.54                     |
| SRC/NCF3%           | 195.48                                      | 166.89                | 210.14                 | 78.68                     | 257.67                            | 245.6                 | 268.53                 | 43.76                     |
| SRC/NCF5%           | 195.21                                      | 166.07                | 209.69                 | 78.35                     | 256.71                            | 244.7                 | 269.27                 | 44.27                     |
| SRC/NCF7%           | 192.85                                      | 164.09                | 207.74                 | 78.27                     | 257.46                            | 245.28                | 270.19                 | 43.02                     |
| RC                  | 219.58                                      | 197.42                | 224.67                 | 71.63                     | 235.81                            | 243.34                | 239.76                 | 38.68                     |
| RC/NCF1%            | 219.73                                      | 200.54                | 223.97                 | 77.88                     | 235.38                            | 242.01                | 238.61                 | 44.27                     |
| RC/NCF3%            | 219.8                                       | 199.71                | 224.07                 | 79.49                     | 234.95                            | 244.19                | 239.06                 | 45.74                     |
| RC/NCF5%            | 221.1                                       | 201.13                | 225.35                 | 80.07                     | 236.82                            | 244.7                 | 240.23                 | 45.76                     |
| RC/NCF7%            | 220.21                                      | 193.03                | 225.17                 | 78.04                     | 236.15                            | 244.98                | 240.16                 | 45.37                     |
| NCF                 |                                             |                       |                        |                           | 335.83                            | 303.14                | 353.48                 | 32.68                     |

**Figure S2.** DSC thermographs of (a) SRC and (b) RC powder

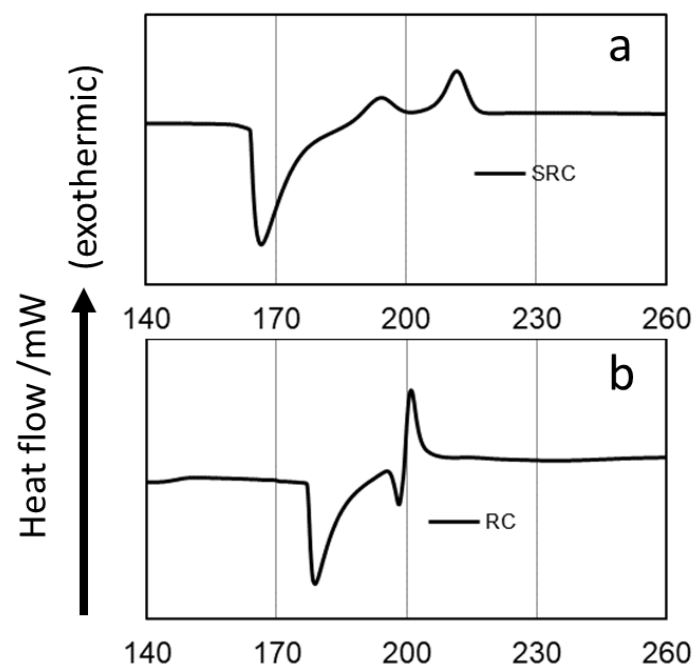

**Table S2.** Data obtained from the DSC thermograms of the SRC/NCF and RC/NCF films

| Samples    | $T_g/^\circ\text{C}$ | Enthalpy/mJ | Decomposition peak/ $^\circ\text{C}$ |
|------------|----------------------|-------------|--------------------------------------|
| SRC/NCF 0% | 172                  | -2516.09    |                                      |
| SRC/NCF 1% | 176                  | -447.07     |                                      |
| SRC/NCF 3% | 178                  | -450.05     |                                      |
| SRC/NCF 5% | 172                  | -492.34     |                                      |
| SRC/NCF 7% | 175                  | -902.07     |                                      |
| RC/NCF 0%  | 162                  | -336.34     | 224.72                               |
| RC/NCF 1%  | 178                  | -295.79     | 223.77                               |
| RC/NCF 3%  | 176                  | -174.52     | 224.76                               |
| RC/NCF 5%  | 171                  | -316.78     | 223.14                               |
| RC/NCF 7%  | 178                  | -398.13     | 230.61                               |
| NCF        | 153.16               | 219.38      | >260                                 |

**Table S3.** Degree of crystallinity of SRC/NCF and RC/NCF films

| <b>Samples</b>    | <b>% Crystallinity</b> |
|-------------------|------------------------|
| <b>SRC</b>        | 56.05                  |
| <b>SRC/NCF 1%</b> | 63.82                  |
| <b>SRC/NCF 3%</b> | 71.20                  |
| <b>SRC/NCF 5%</b> | 70.20                  |
| <b>SRC/NCF 7%</b> | 55.09                  |
| <b>RC</b>         | 60.53                  |
| <b>RC/NCF 1%</b>  | 66.18                  |
| <b>RC/NCF 3%</b>  | 64.63                  |
| <b>RC/NCF 5%</b>  | 60.05                  |
| <b>RC/NCF 7%</b>  | 60.92                  |
| <b>NCF</b>        | 78.06                  |

**Figure S3.** FTIR spectra of the SRC/NCF films: overlaid (upper) and offset (lower)

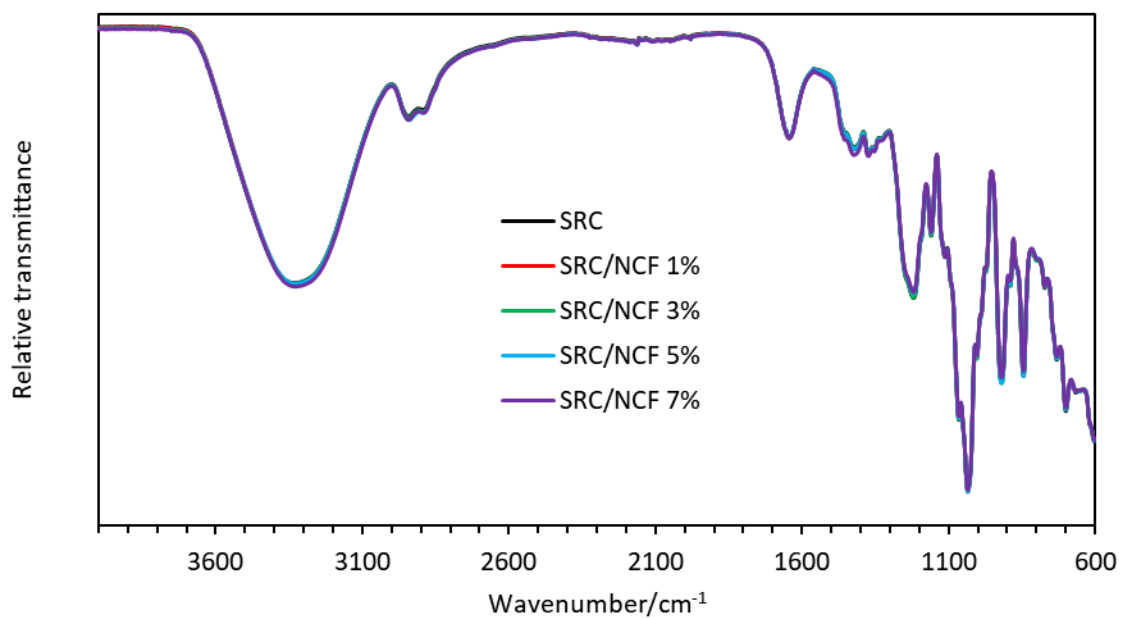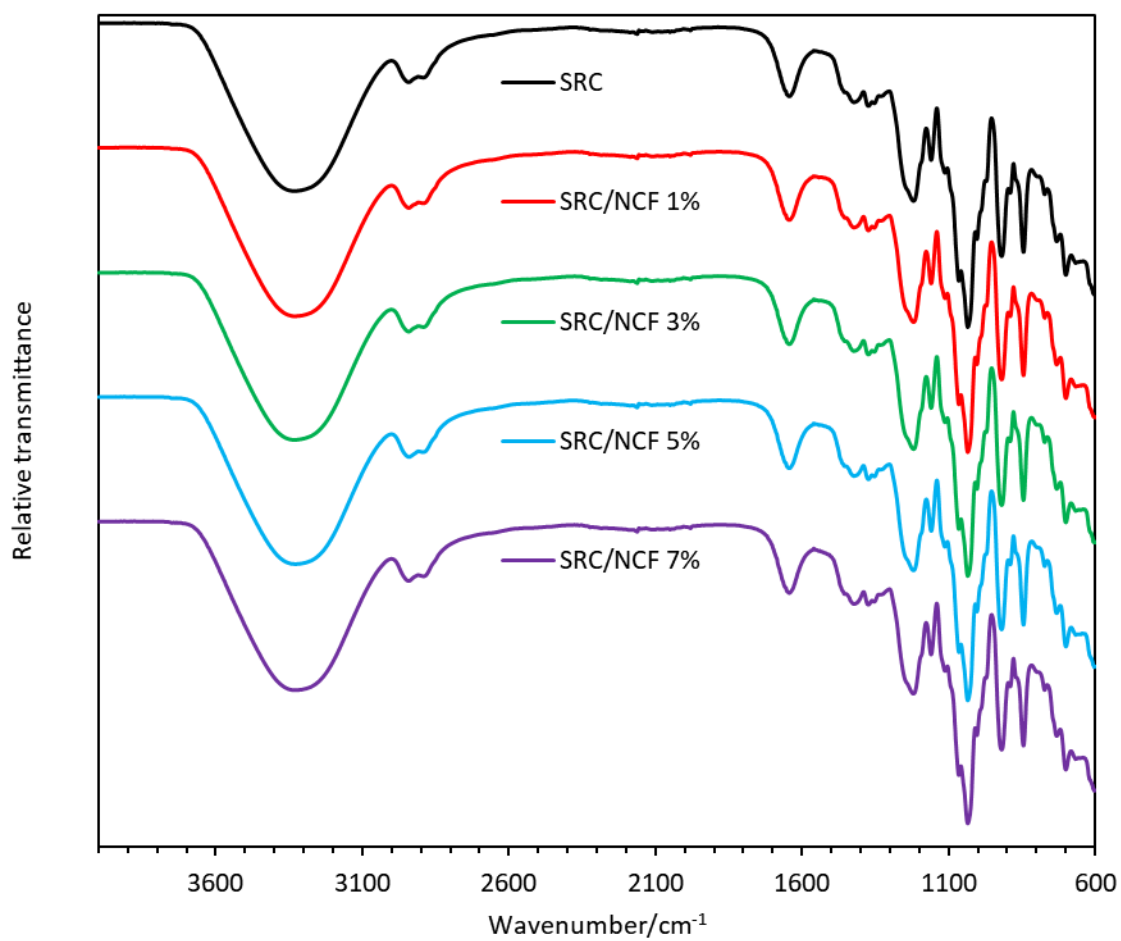

**Figure S4.** FTIR spectra of the RC/NCF films: overlaid (upper) and offset (lower)

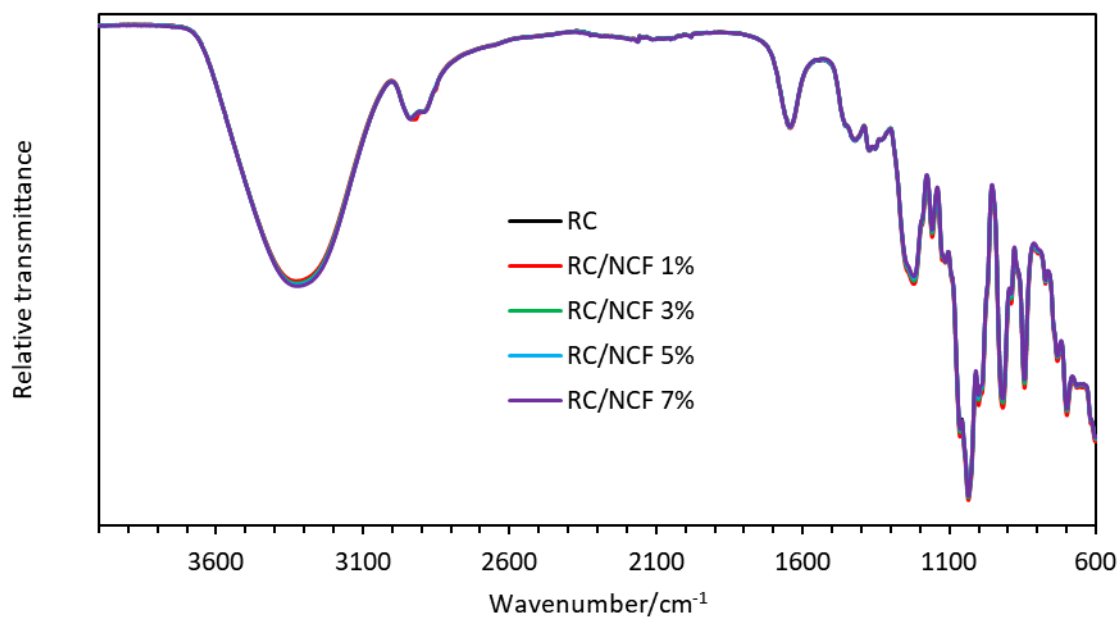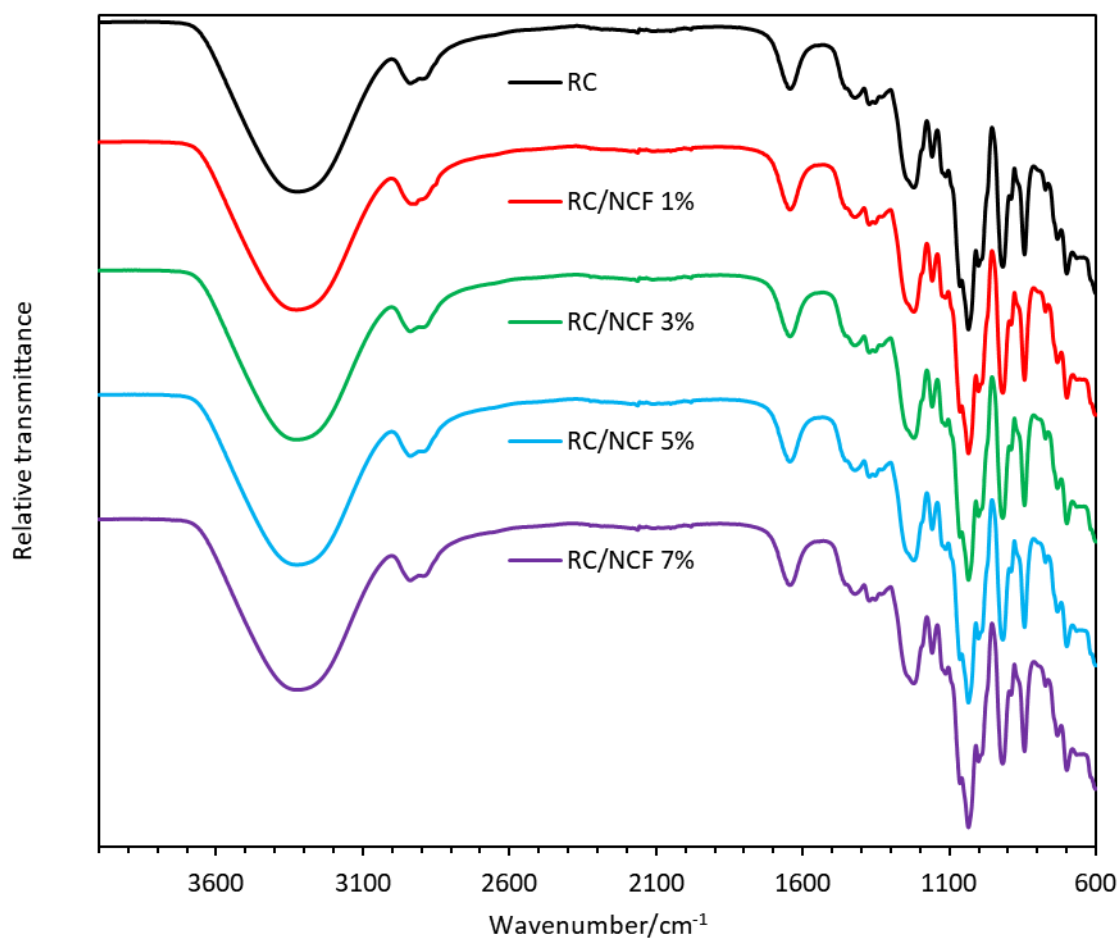

Supplement: polymers-12-01145-s001.pdf [file polymers-12-01145-s001.pdf]
